# Reference values for exercise limitations among adults with congenital heart disease. Relation to activities of daily life—single centre experience and review of published data

Aleksander Kempny<sup>1,2\*</sup>, Konstantinos Dimopoulos<sup>1,3</sup>, Anselm Uebing<sup>1</sup>, Pamela Mocerri<sup>1</sup>, Lorna Swan<sup>1</sup>, Michael A. Gatzoulis<sup>1,3</sup>, and Gerhard-Paul Diller<sup>1,2,3</sup>

<sup>1</sup>Adult Congenital Heart Centre and Centre for Pulmonary Hypertension, Royal Brompton Hospital, Sydney Street, SW3 6NP London, UK; <sup>2</sup>Department of Cardiology and Angiology, Adult Congenital and Valvular Heart Disease Center, University Hospital of Münster, Munster, Germany; and <sup>3</sup>National Heart and Lung Institute, Imperial College School of Medicine, London, UK

Received 5 September 2011; revised 24 October 2011; accepted 17 November 2011; online publish-ahead-of-print 23 December 2011

## Aims

We aimed to investigate the distribution of exercise capacity across the spectrum of adult congenital heart disease (ACHD) using own data and the published experience and to provide diagnosis, gender-, and age- specific reference values.

## Methods and results

Publications describing exercise capacity in ACHD patients using cardiopulmonary exercise testing (CPET) were identified ( $n = 2286$  patients in 23 papers). In addition, we included 2129 patients who underwent CPET at our own institution. The majority of patients (80%) had reduced peak oxygen uptake (peak  $\text{VO}_2$ ) compared with normal values (defined as  $<90\%$  of predicted peak  $\text{VO}_2$ ). There were significant differences in peak  $\text{VO}_2$  between subgroups of patients, with the lowest values seen in patients with Eisenmenger syndrome and complex heart disease. However, even in patients with simple lesions, peak  $\text{VO}_2$  was on average significantly reduced compared with normal values. Based on a large number of observations we herewith provide gender- and age-specific peak  $\text{VO}_2$  centile plots for the most common lesions (Tetralogy of Fallot, systemic right ventricle, Ebstein anomaly and Fontan–palliation) and relate disease-specific exercise capacity to that required for specific activities of daily life, sports, and occupations.

## Conclusion

We provide age-, gender-, and diagnosis-specific data on peak  $\text{VO}_2$  levels across the spectrum of ACHD allowing to compare the exercise capacity of individual patients with that of their peer patients. These data should be helpful in interpreting CPET results, guiding therapy, and advising patients on activities of daily life, sports participation, and choice of occupation.

## Keywords

Adult congenital heart disease • Tetralogy of fallot • Transposition of the great arteries • Fontan procedure • Eisenmenger syndrome • Exercise test

## Introduction

Most patients born with congenital heart disease are expected to reach adulthood in the current era.<sup>1</sup> Owing to the frequent late complications, however, many of them require and will benefit from life-long cardiac follow-up.<sup>2,3</sup> Among the different screening

tools employed during such periodic follow-up, cardiopulmonary exercise testing (CPET) has emerged as one of the most valuable. It is non-invasive, enables risk stratification with regard to morbidity and mortality, and helps deciding on the need and timing of therapeutic interventions. The interpretation of CPET results in patients with adult congenital heart disease (ACHD) remains

\* Corresponding author. Tel: +44 207351 8602, Fax: +44 207351 8629, Email: kempny@gmail.com

Published on behalf of the European Society of Cardiology. All rights reserved. © The Author 2011. For permissions please email: journals.permissions@oup.com

challenging, however. It is well known that exercise capacity is reduced in these patients. Relating exercise capacity to normal values obtained in healthy volunteers may, however, not tell the whole story in ACHD patients. It is obvious that one cannot expect an Eisenmenger patient to achieve a similar peak oxygen uptake (peak  $\text{VO}_2$ ) as a patient with a simple cardiac lesion. As some (variable) level of impairment in peak  $\text{VO}_2$  is to be expected it may be more helpful to interpret the achieved level of exercise capacity in comparison with what would be usual/expected given the patient's age, gender, and underlying diagnosis. Comparing an individual patient to his/her peer patients may inform clinicians if this represents a 'good' or 'bad' exercise capacity for a given patient group.

Exercise capacity has been assessed in many studies both in adult and paediatric patients with congenital heart disease. Protocols differ between centres and, thus, the results cannot be generalized to all patients with this disease. Ideally, every centre should develop its own database and reference values. Given the wide anatomic spectrum of ACHD patients and the variable patient volume attached to different centres, this may not be practicable for most centres. In the absence of such centre specific data, combining the available evidence may provide best estimates of expected exercise capacity. In addition to averaging out outliers by combining data, increasing patient numbers reduces stochastic uncertainty and should decrease variability of the data.

Our aim in this study was to<sup>1</sup> compare a large ACHD-CPET data set from our institution with CPET data reported in the literature;<sup>2</sup> to combine available data to investigate the expected peak  $\text{VO}_2$  in relation to patient gender and age in the most prevalent ACHD diagnostic groups and, thus provide disease specific reference values and<sup>3</sup> to examine the potential relation between disease specific exercise limitation and activities of daily life/certain occupations, thus assisting clinicians in advising patients.

## Methods

### Patients

We retrospectively reviewed all cardiopulmonary exercise tests performed in ACHD patients between March 1999 and February 2011 at the Royal Brompton Hospital, London. Exercise tests had been performed as part of their routine clinical assessment.

We also searched PubMed for publications investigating cardiopulmonary exercise capacity in ACHD patients published between 01/01/1985 and 01/06/2011. The search was performed separately for every diagnosis listed in the *Table 1* using the MESH phrase 'exercise test' and the MESH phrase describing the disease.

### Measurements

Details of the cardiopulmonary testing at the Royal Brompton Hospital have been published previously.<sup>4</sup> Briefly, CPET was performed in patients from our institution on a treadmill according to a modified Bruce protocol with an additional first stage at which the patient walks at a velocity of 1 mile/h and a gradient of 5% for 3 min. Oxygen uptake, carbon dioxide production, and ventilation were measured continuously using a computerized breath-by-breath analyser. The  $\text{VE}/\text{VCO}_2$  slope was calculated by linear regression analysis of all data acquired during the exercise period.

### Activities of life data

The minimal peak  $\text{VO}_2$  required to perform daily life activities, sports, and selected occupations was calculated based on the 'Compendium of Physical Activities' maintained by the Arizona State University.<sup>5</sup> The Compendium provides energy costs for several hundred activities with metabolic equivalents values (MET) based on the published literature. The oxygen uptake ( $\text{VO}_2$ ) for each activity was calculated by multiplying the MET value by  $3.5 \text{ mL} \cdot \text{kg}^{-1} \cdot \text{min}^{-1}$ . The values obtained represent average (peak) oxygen uptake. As subjects should be able to perform most of the listed activities continuously, without resorting to anaerobic metabolism, patients should remain below their anaerobic threshold (AT). Based on the mean relation of

**Table 1** Cardiopulmonary exercise data published in the literature

| Diagnosis           | Patients with reported $\text{pVO}_2$ |      |                |          | Patients with reported $\text{VE}/\text{VCO}_2$ |      |                          |          | References                    |
|---------------------|---------------------------------------|------|----------------|----------|-------------------------------------------------|------|--------------------------|----------|-------------------------------|
|                     | n                                     | Age  | $\text{pVO}_2$ | Male (%) | n                                               | Age  | $\text{VE}/\text{VCO}_2$ | Male (%) |                               |
| ASD                 | 222                                   | 42.4 | $21.9 \pm 7.9$ | 47.7     | 78                                              | 45.0 | $32.3 \pm 3.4$           | 61.3     | 23,24,28,45                   |
| ccTGA               | 61                                    | 31.6 | $20.9 \pm 7.4$ | 55.7     | 21                                              | 30.0 | $37.2 \pm 4.3$           | 61.3     | 23,35,45                      |
| CoA                 | 100                                   | 31.0 | $27.5 \pm 7.0$ | 61.2     | 28                                              | 27.0 | $30.1 \pm 2.3$           | 61.3     | 35,45                         |
| Complex             | 20                                    | 33.6 | $15.9 \pm 3.4$ | 50.0     | —                                               | —    | —                        | —        | 35                            |
| Ebstein             | 230                                   | 22.9 | $21.1 \pm 6.7$ | 51.5     | 28                                              | 31   | $37.4 \pm 2.6$           | 61.3     | 19,23,30,35,45                |
| Eisenmenger         | 43                                    | 41.8 | $13.0 \pm 4.1$ | 38.7     | 19                                              | 39.0 | $63.4 \pm 5.8$           | 61.3     | 35,45                         |
| Fontan              | 590                                   | 19.4 | $22.7 \pm 5.8$ | 57.6     | 65                                              | 23.0 | $40.2 \pm 3.5$           | 61.3     | 18,20,23,27,29,31,33,35–37,45 |
| TGA-arterial switch | 104                                   | 12.4 | $38.9 \pm 9.1$ | 63.5     | 60                                              | 13.3 | $30.7 \pm 4.4$           | 73.3     | 21,26                         |
| TGA-atrial switch   | 391                                   | 25.3 | $24.3 \pm 7.5$ | 64.5     | 274                                             | 26.3 | $33.4 \pm 7.8$           | 64.6     | 16,23,25,35                   |
| ToF                 | 487                                   | 29.6 | $24.2 \pm 6.8$ | 55.3     | 124                                             | 26.0 | $31.1 \pm 4.6$           | 61.3     | 23,32,34,35,45                |
| Valvular            | 38                                    | 32.0 | $26.6 \pm 9.1$ | 61.3     | 38                                              | 32.0 | $32.2 \pm 2.9$           | 61.3     | 45                            |

Age is expressed in years, peak  $\text{VO}_2$  ( $\text{pVO}_2$ ) in  $\text{mL}/\text{kg}/\text{min}$ .  $\text{VE}/\text{VCO}_2$  stands for  $\text{VE}/\text{VCO}_2$  slope. ASD, atrial septal defect; TGA, transposition of the great arteries; ccTGA, congenitally corrected TGA; CoA, coarctation of the aorta; Complex, complex lesions including patients with cyanosis; ToF, tetralogy of Fallot; Valvular, collective of patients with various valvular lesions.

(VO<sub>2</sub> at AT)/peak VO<sub>2</sub> in our cohort ( $=0.70 \pm 0.13$ ) the VO<sub>2</sub> result was divided by 0.7 (peak VO<sub>2</sub> = MET · 3.5 mL · kg<sup>-1</sup> · min<sup>-1</sup> · 0.7<sup>-1</sup>) to estimate the VO<sub>2</sub> at or below AT and therefore required to sustain activity levels for extended periods of time.

## Statistical analysis

The distribution of data was assessed for normality using the D'Agostino–Pearson test and data were log-transformed if there was significant evidence for departure from normality. In case of normal distribution, the comparison between two groups was performed using unpaired t-test and Welch test in case of unequal variances. For data violating a normal distribution Mann–Whitney *U* tests were used. Based on data reported in the literature, we have calculated a weighted mean and a pooled standard deviation for every subgroup as described previously.<sup>6</sup> Categorical variables were compared using  $\chi^2$  test. When more than two data sets were compared one-way ANOVA was used. All tests were performed two-sided.

The predicted peak VO<sub>2</sub> (i.e. reference value for healthy individuals) for men and women was calculated using the formula published by Wassermann taking the mean age in every subgroup as well as reported average weight and height.<sup>7,8</sup> In groups consisting of men and women, a weighted mean peak VO<sub>2</sub> was calculated. Centile curves for describing the relationship between peak VO<sub>2</sub>, age and gender were generated using a combined method based on the Cole and Green as well as Rigby and Stasinopoulos algorithm using the GAMLSS package for R.<sup>9–12</sup> For all analyses, a *P*-value < 0.05 was considered statistically significant. Statistical analyses were performed using MedCalc for Windows, version 11.6.1.0 (MedCalc Software, Mariakerke, Belgium) and R-package version 2.13.0.

## Results

Data of 4415 patients were analysed. This included 2129 patients from our own institution. Table 2 provides information on underlying demographics, diagnosis, and distribution of peak VO<sub>2</sub> and VE/CO<sub>2</sub> slope. The literature search revealed 23 papers

reporting peak VO<sub>2</sub> data in 2286 and VE/CO<sub>2</sub> data in 735 patients (Table 1).

The average of peak VO<sub>2</sub> and VE/CO<sub>2</sub> slope was comparable between the own data and data reported in the literature for most diagnostic subgroups (Table 2, Figure 1). This is illustrated by the good visual agreement between histograms (representing the own data) and the density distribution lines (showing the distribution of the entire cohort). Only in patients with transposition of the great arteries (TGA) after arterial switch operation, peak VO<sub>2</sub> reported in the literature was significantly higher than that observed in our cohort ( $38.9 \pm 9.1$  vs.  $31.9 \pm 9.2$  mL · kg<sup>-1</sup> · min<sup>-1</sup>, *P* < 0.0001). Our patients, however, were significantly older ( $21.6 \pm 4.1$  vs.  $12.4 \pm 3.2$  years, *P* < 0.0001) compared with the published cohort. In addition, peak VO<sub>2</sub> values for patients with tetralogy of Fallot (ToF) from our institution and those reported in the literature were statistically significantly different ( $25.2 \pm 8.5$  vs.  $24.2 \pm 6.8$  mL · kg<sup>-1</sup> · min<sup>-1</sup>, *P* = 0.04). The absolute difference in mean peak VO<sub>2</sub>, however, was small (1.0 mL · kg<sup>-1</sup> · min<sup>-1</sup> being corresponding to ~4% of mean) and the high number of patients in this subgroup (*n* = 1055) probably accounts for the significance level.

## Distribution of peak VO<sub>2</sub> and VE/CO<sub>2</sub> slope in various subgroups

Owing to the differences in age, we compared peak VO<sub>2</sub> in every diagnostic subgroup with the predicted peak VO<sub>2</sub> for sedentary individuals of the same age and gender distribution (Figure 1) using reference values published by Wasserman *et al.*<sup>7</sup> There were significant differences in peak VO<sub>2</sub> between subgroups of patients (*P* < 0.001 on one-way ANOVA based on the own data). Peak VO<sub>2</sub> was found to be lowest in patients with Eisenmenger syndrome and complex heart disease (mean ± SD:  $43 \pm 13$  and  $46 \pm 16\%$  of predicted peak VO<sub>2</sub>, respectively) and was highest in patients with TGA after arterial switch operation, in the cohort of patients with various forms of valvular heart disease and in patients with repaired aortic coarctation ( $89 \pm 22$ ,

**Table 2** Cardiopulmonary exercise data from our own institution

| Diagnosis           | <i>n</i> | Age  | pVO <sub>2</sub> | VE/CO <sub>2</sub> | Male (%) | <i>P</i> -value, pVO <sub>2</sub> | <i>P</i> -value, VE/CO <sub>2</sub> |
|---------------------|----------|------|------------------|--------------------|----------|-----------------------------------|-------------------------------------|
| ASD                 | 128      | 44.8 | 22.4 ± 8.4       | 33.7 ± 10.8        | 37.5     | 0.58                              | 0.27                                |
| ccTGA               | 68       | 36.0 | 21.1 ± 7.9       | 35.3 ± 13.8        | 52.9     | 0.88                              | 0.54                                |
| CoA                 | 119      | 30.3 | 27.8 ± 9.9       | 30.2 ± 8.2         | 63.0     | 0.80                              | 0.95                                |
| Complex             | 85       | 31.7 | 15.7 ± 5.9       | 52.0 ± 19.5        | 52.9     | 0.88                              | —                                   |
| Ebstein             | 102      | 38.2 | 21.7 ± 7.9       | 34.9 ± 10.1        | 52.0     | 0.48                              | 0.2                                 |
| Eisenmenger         | 76       | 39.4 | 12.2 ± 3.8       | 71.8 ± 55.0        | 28.9     | 0.29                              | 0.51                                |
| Fontan              | 321      | 21.0 | 22.8 ± 7.4       | 34.4 ± 10.1        | 56.6     | 0.82                              | <0.0001*                            |
| TGA-arterial switch | 46       | 21.6 | 31.9 ± 9.2       | 29.8 ± 4.7         | 78.3     | <0.0001*                          | 0.31                                |
| TGA-atrial switch   | 98       | 31.3 | 24.9 ± 7.5       | 33.5 ± 10.6        | 55.1     | 0.48                              | 0.92                                |
| ToF                 | 568      | 32.3 | 25.2 ± 8.5       | 31.7 ± 8.9         | 55.7     | 0.04*                             | 0.47                                |
| Valvular            | 401      | 35.9 | 26.3 ± 9.9       | 32.6 ± 10.9        | 54.4     | 0.86                              | 0.82                                |
| VSD                 | 117      | 37.6 | 23.5 ± 9.3       | 34.1 ± 11.1        | 53.8     | —                                 | —                                   |

*P*-values compare corresponding sets of data (pVO<sub>2</sub> and VE/CO<sub>2</sub>) between Tables 1 and 2. Age is expressed in years, peak VO<sub>2</sub> in mL/kg/min. VE/CO<sub>2</sub> stands for VE/CO<sub>2</sub> slope. ASD, atrial septal defect; TGA, transposition of the great arteries; ccTGA, congenitally corrected TGA; CoA, coarctation of the aorta; Complex, complex lesions including patients with cyanosis; ToF, tetralogy of Fallot; Valvular, collective of patients with various valvular lesions; VSD, ventricular septal defect. \**P* < 0.05.

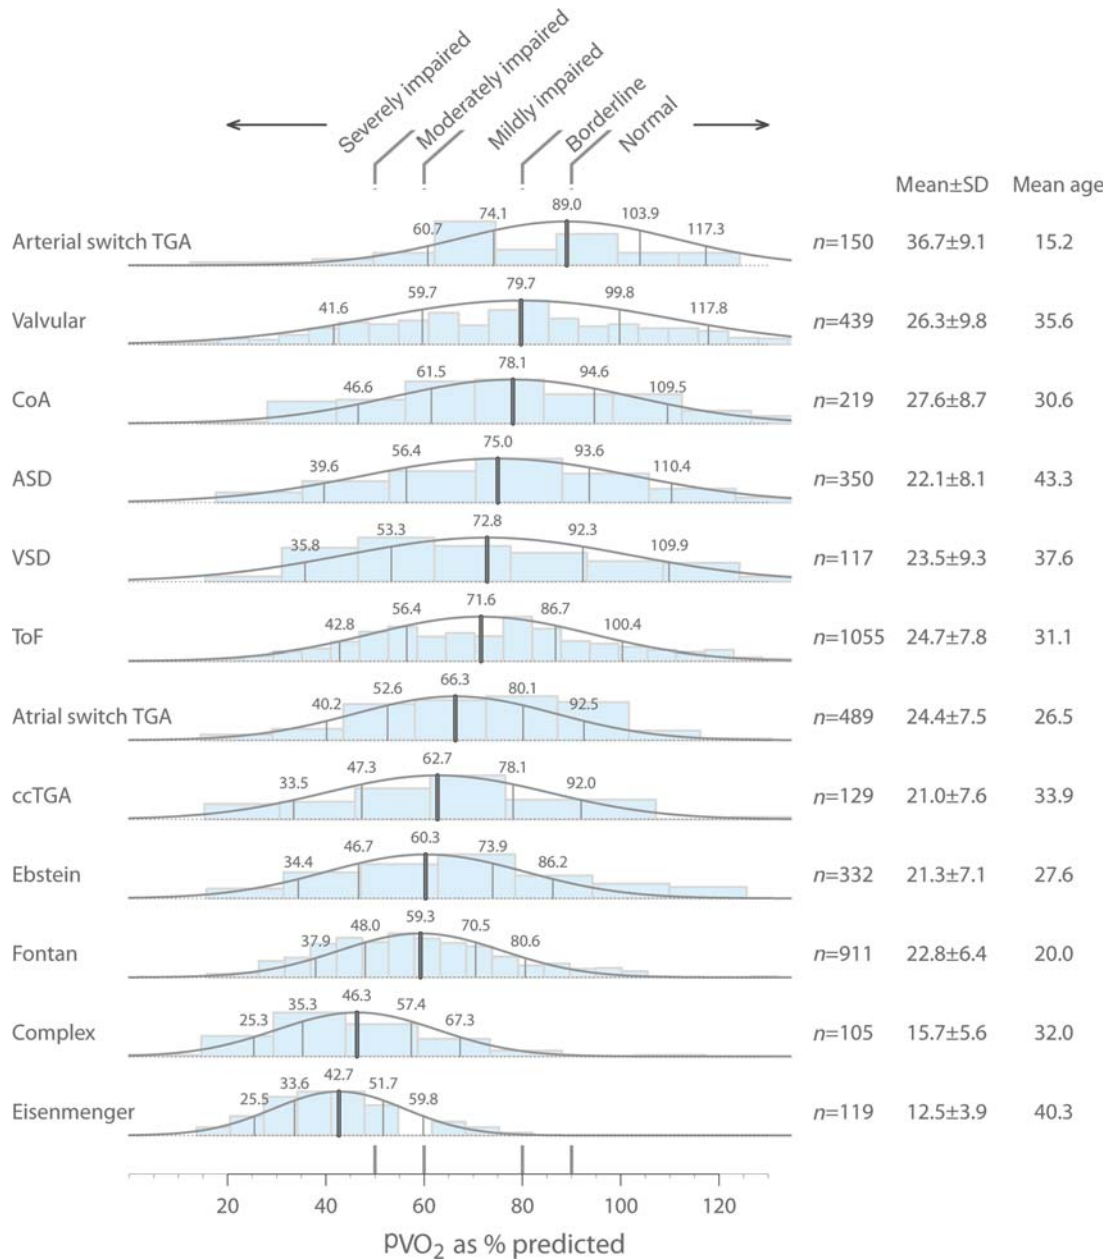

**Figure 1** Peak oxygen uptake (peak  $\text{VO}_2$ ) data expressed as % of predicted value. Histograms represent data from our own institution. The density lines above histograms and the numbers to the right of the graph relate to all patients with a given diagnosis. The numbers above the density lines indicate %peak  $\text{VO}_2$  values for the 10, 25, 50, 75 and 90th centile. ASD, atrial septal defect; ccTGA, congenitally corrected TGA; CoA, coarctation of aorta; Complex, complex congenital heart disease (including univentricular hearts); Ebstein, Ebstein anomaly; Eisenmenger, Eisenmenger syndrome; Fontan, patients after Fontan palliation; TGA, transposition of the great arterial; ToF, tetralogy of Fallot; Valvular, mixed collective of patients with congenital valvular heart disease; VSD, ventricular septal defect.

$80 \pm 30$ , and  $78 \pm 25\%$  of predicted peak  $\text{VO}_2$ , respectively). There were also significant differences in  $\text{VE}/\text{VCO}_2$  slope ( $P < 0.001$ , on one-way ANOVA) with the highest values found in patients with Eisenmenger syndrome and complex heart disease ( $72 \pm 55$  and  $52 \pm 19$ , respectively) and the lowest values in patients with TGA after arterial switch and corrected aortic coarctation ( $30 \pm 5$  and  $30 \pm 8$ , respectively) (Table 2). Table 1 informs

about the distribution of peak  $\text{VO}_2$  and  $\text{VE}/\text{VCO}_2$  slope (mean and standard deviation) in published studies.

In most diagnostic subgroups men achieved significantly higher peak  $\text{VO}_2$ -values than women (Table 3). Therefore, when looking at the peak  $\text{VO}_2$  levels required to perform various activities (such as movement, sporting activities, occupation, or home activities), more women than men were found to have an exercise

**Table 3** Comparison between age, peak oxygen uptake (peak VO<sub>2</sub>) and exercise time between men and women in the own population

|                 | Age         |             |         | pVO <sub>2</sub> |            |          | Exercise time |           |          |
|-----------------|-------------|-------------|---------|------------------|------------|----------|---------------|-----------|----------|
|                 | Male        | Female      | P-value | Male             | Female     | P-value  | Male          | Female    | P-value  |
| ASD             | 50.1 ± 17.2 | 41.6 ± 17.4 | 0.01*   | 24 ± 10.3        | 21.4 ± 7.0 | 0.14     | 592 ± 255     | 576 ± 208 | 0.72     |
| ccTGA           | 35.5 ± 13.7 | 36.5 ± 16.0 | 0.78    | 22.3 ± 8.5       | 19.7 ± 6.9 | 0.17     | 629 ± 190     | 506 ± 181 | 0.01*    |
| CoA             | 29.3 ± 11.4 | 32.2 ± 10.8 | 0.18    | 30.9 ± 9.8       | 22.3 ± 7.2 | <0.0001* | 731 ± 243     | 624 ± 208 | 0.02*    |
| Complex         | 32.6 ± 14.1 | 30.7 ± 10.9 | 0.49    | 16.6 ± 6.6       | 14.6 ± 4.9 | 0.10     | 448 ± 176     | 366 ± 162 | 0.03*    |
| Ebstein         | 39.3 ± 15.1 | 36.0 ± 15.5 | 0.29    | 24.1 ± 8.3       | 19.1 ± 6.7 | 0.001*   | 619 ± 242     | 552 ± 185 | 0.13     |
| Eisenmenger     | 37.4 ± 15.9 | 40.2 ± 12.7 | 0.46    | 11.9 ± 4.1       | 12.4 ± 3.7 | 0.62     | 325 ± 177     | 334 ± 158 | 0.83     |
| Fontan          | 21.8 ± 8.6  | 23.5 ± 9.4  | 0.054   | 24.3 ± 8.5       | 20.1 ± 5.6 | <0.0001* | 654 ± 208     | 555 ± 147 | 0.0002*  |
| Art. switch TGA | 21.6 ± 4.1  | 20.9 ± 3.8  | 0.62    | 33.8 ± 9.0       | 25.2 ± 6.6 | 0.003*   | 820 ± 195     | 636 ± 135 | 0.004*   |
| Atr. switch TGA | 31.4 ± 10.2 | 31.2 ± 7.2  | 0.91    | 27.4 ± 7.3       | 21.8 ± 6.5 | 0.0001*  | 714 ± 211     | 555 ± 171 | <0.0001* |
| ToF             | 33.1 ± 13.5 | 31.4 ± 12.3 | 0.13    | 27.2 ± 9.0       | 22.5 ± 6.8 | <0.0001* | 715 ± 217     | 609 ± 194 | <0.0001* |
| Valvular        | 35.6 ± 15.4 | 36.1 ± 15.9 | 0.73    | 29.2 ± 10.5      | 22.7 ± 7.7 | <0.0001* | 697 ± 242     | 571 ± 226 | <0.0001* |
| VSD             | 37.5 ± 16.5 | 37.9 ± 12.3 | 0.9     | 26.6 ± 10.0      | 19.9 ± 7.1 | <0.0001* | 663 ± 219     | 571 ± 197 | 0.03*    |

Age is expressed in years, peak VO<sub>2</sub> (pVO<sub>2</sub>) in mL/kg/min, exercise time in seconds. ASD, atrial septal defect; TGA, transposition of the great arteries; ccTGA, congenitally corrected TGA; CoA, coarctation of the aorta; Complex, complex lesions including patients with cyanosis; ToF, tetralogy of Fallot; Valvular, collective of patients with various valvular lesions; VSD, ventricular septal defect. \*P < 0.05.

capacity below the required threshold in each subgroup (Figure 2). Interestingly, at the lower end of the spectrum of exercise capacity, notably in Eisenmenger patients, no significant difference between men and women existed and, if anything, women had slightly higher peak VO<sub>2</sub> values.

Overall, there was a moderate correlation between peak VO<sub>2</sub> and age in our patients ( $r = -0.35$ ,  $P < 0.0001$ ). For the subgroups of patients with sufficient number of observations, centile curves relating peak VO<sub>2</sub> distribution to age and stratified by gender were generated to illustrate the average peak VO<sub>2</sub> and to show 10, 25, 75, and 90th percentiles (Figure 3).

In addition, Figure 4 shows centile curves for percentage of predicted peak VO<sub>2</sub> in selected diagnoses, while Figure 5 gives an overview over peak VO<sub>2</sub> in different diagnostic groups, splitting patients in three age groups.

## Discussion

Peak VO<sub>2</sub> and VE/VCO<sub>2</sub> slope are well-established measures of exercise tolerance. They have been shown to correlate with New York Heart Association (NYHA) functional class, quality of life and to be strong independent predictors of morbidity and mortality, both, in the setting of heart failure and congenital heart disease.<sup>13–15</sup>

The distribution of exercise capacity across the spectrum of ACHD has been investigated by numerous studies.<sup>16–37</sup> Most of the studies performed so far however were small, single centre, based or focused on a limited number of diagnoses and, therefore, have provided only a limited overview of the distribution of exercise capacity in this growing patient population. Moreover, in most of these studies, values for exercise parameters were reported without taking into account patient age or gender. Since significant differences in exercise capacity between males and females exist,

this latter aspect is, nevertheless, relevant. In this study, we aggregated the available data on exercise capacity in ACHD. Comparing CPET results in ACHD patients from our institution with the data published by other centres, we found that by and large no relevant difference in peak VO<sub>2</sub> and VE/CO<sub>2</sub> slope exists. To our best knowledge, this is the first study to indicate that exercise capacity data in ACHD patients can be generalized and results are not centre specific.

## Exercise capacity distribution across the spectrum of ACHD patients

Our study confirms that exercise capacity differs significantly across the spectrum of ACHD. In accordance with previous studies, patients with Eisenmenger syndrome and complex congenital heart disease (including patients with univentricular circulation) were found to have the lowest peak VO<sub>2</sub> values and highest VE/VCO<sub>2</sub> slope values.<sup>17,23</sup> At the other end of the spectrum, patients with aortic coarctation and patients with TGA after arterial switch operation were found to have the highest peak VO<sub>2</sub> values and lowest VE/VCO<sub>2</sub> slope values. However, even in these latter groups, peak VO<sub>2</sub> values were on average significantly reduced when compared with normal values ( $P < 0.0001$  for both). The observation that TGA patients after arterial switch operation had the highest peak VO<sub>2</sub> values among ACHD patients, may in part relate to the younger age of this patient group, but, it also suggests that despite being born with a lesion of high complexity (TGA) restoring normal anatomy and physiology early in life may result in almost normal exercise capacity later on in adolescent and adult. Comparing exercise capacity of TGA patients in the published literature with a mean age of ~12 years with our own cohort of patients (mean age ~22 years) revealed a reduced percentage predicted peak VO<sub>2</sub> in the latter. One could speculate that this reflects on-going morbidity and the onset of



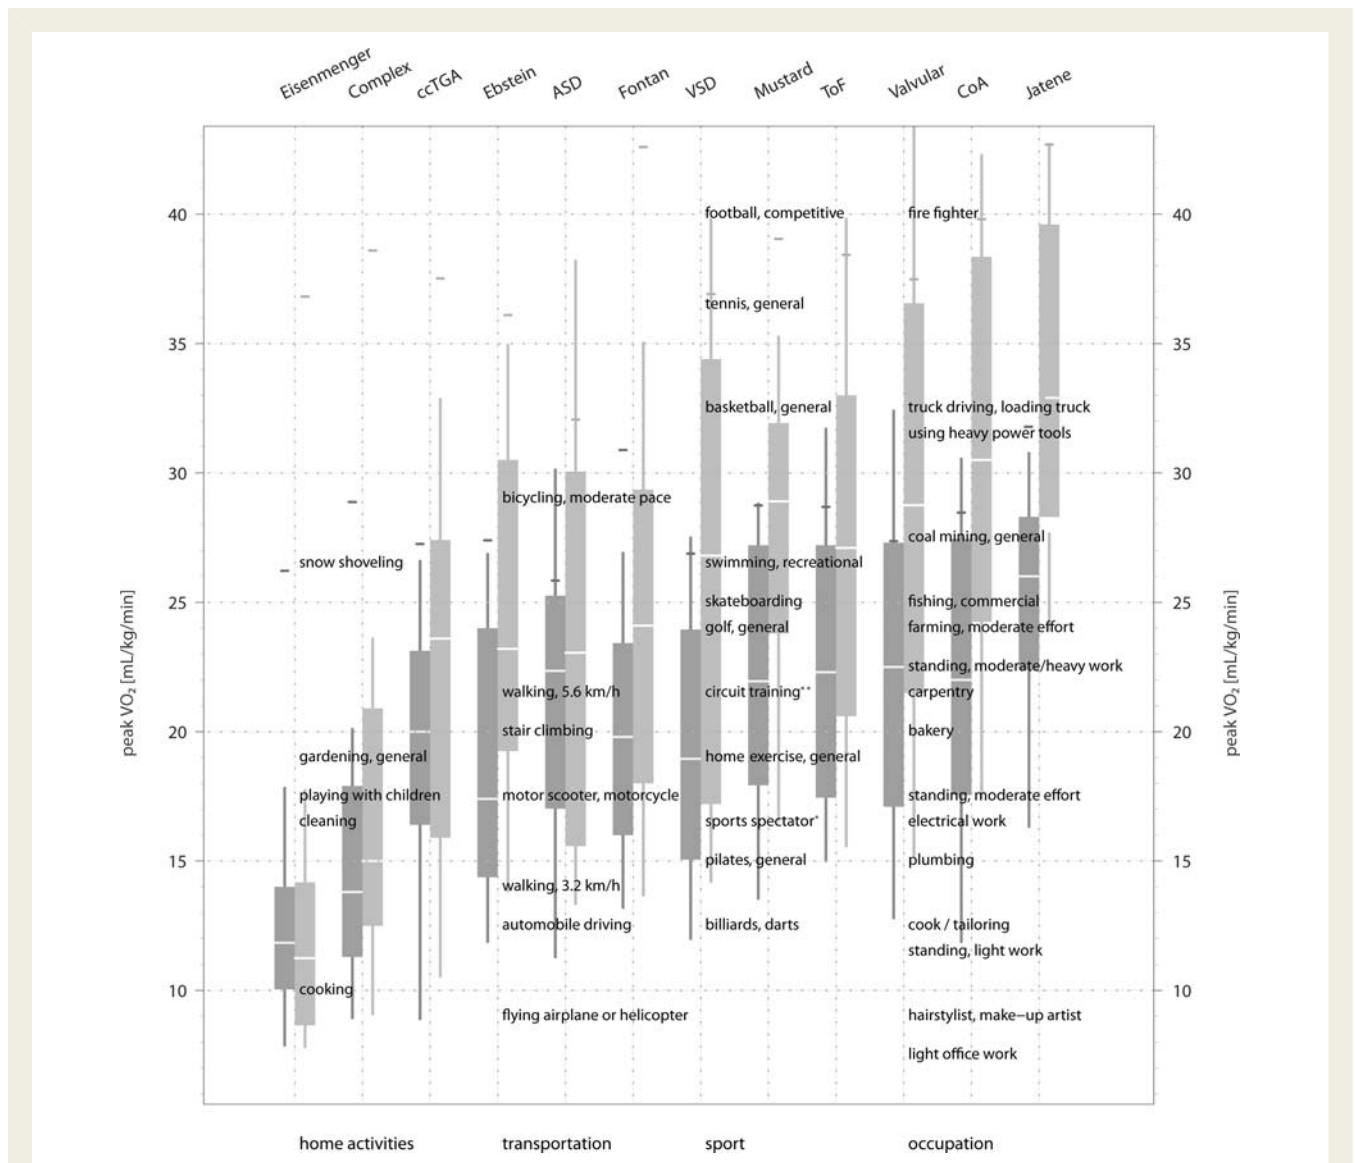

**Figure 2** Peak oxygen consumption (peak  $\text{VO}_2$ ) for various diagnostic groups stratified by gender and compared with oxygen consumption derived from estimated average energy expenditure for different types of activities based on values provided in the literature.<sup>5</sup> It should be noted that these are point estimates and differences depending on gender and anthropometric measures as well as dexterity or mechanical efficiency in performing an activity are likely to exist. For details see text. Each box and whiskers graph represents (from bottom to top) the 10, 25, 50, 75, and 90th quantile. Dark grey—female, light grey—male. The short horizontal lines plotted outside the boxes indicate 100% of the predicted peak  $\text{VO}_2$  value. (\*), sports spectator, very excited, emotional; (\*\*), moderate effort.

late complications such as right ventricular outflow tract (RVOT) obstruction. In fact, Giardini *et al.* have recently reported that patients with RVOT obstruction have significantly lower exercise capacity compared with patients without.<sup>26</sup>

### Impact of gender on exercise capacity

In the current paper, we analysed CPET data for men and women with ACHD separately and found significant differences between genders. While this may not be surprising given that peak  $\text{VO}_2$  is generally 20–30% higher in healthy men compared with women, this difference in healthy subjects is largely explained by peripheral factors.<sup>38</sup> This includes a higher muscle mass, a higher haemoglobin

concentration (i.e. higher oxygen carrying capacity of blood) and a better physical conditioning of males (with men being generally more physically active).<sup>39,40</sup> In patients with heart disease, however, it could be argued that cardiac limitations predominate, reducing, or eliminating the effect of the periphery on exercise capacity. The results of the current study in ACHD patients with simple/intermediate complexity lesions suggest that significant differences in peak  $\text{VO}_2$  continue to exist between males and females. This finding is consistent with a study performed in patients with acquired heart failure,<sup>40</sup> thus highlighting the central role of the skeletal muscle abnormalities and  $\text{O}_2$  extraction<sup>41</sup> even in the setting of chronic heart disease. In contrast, we

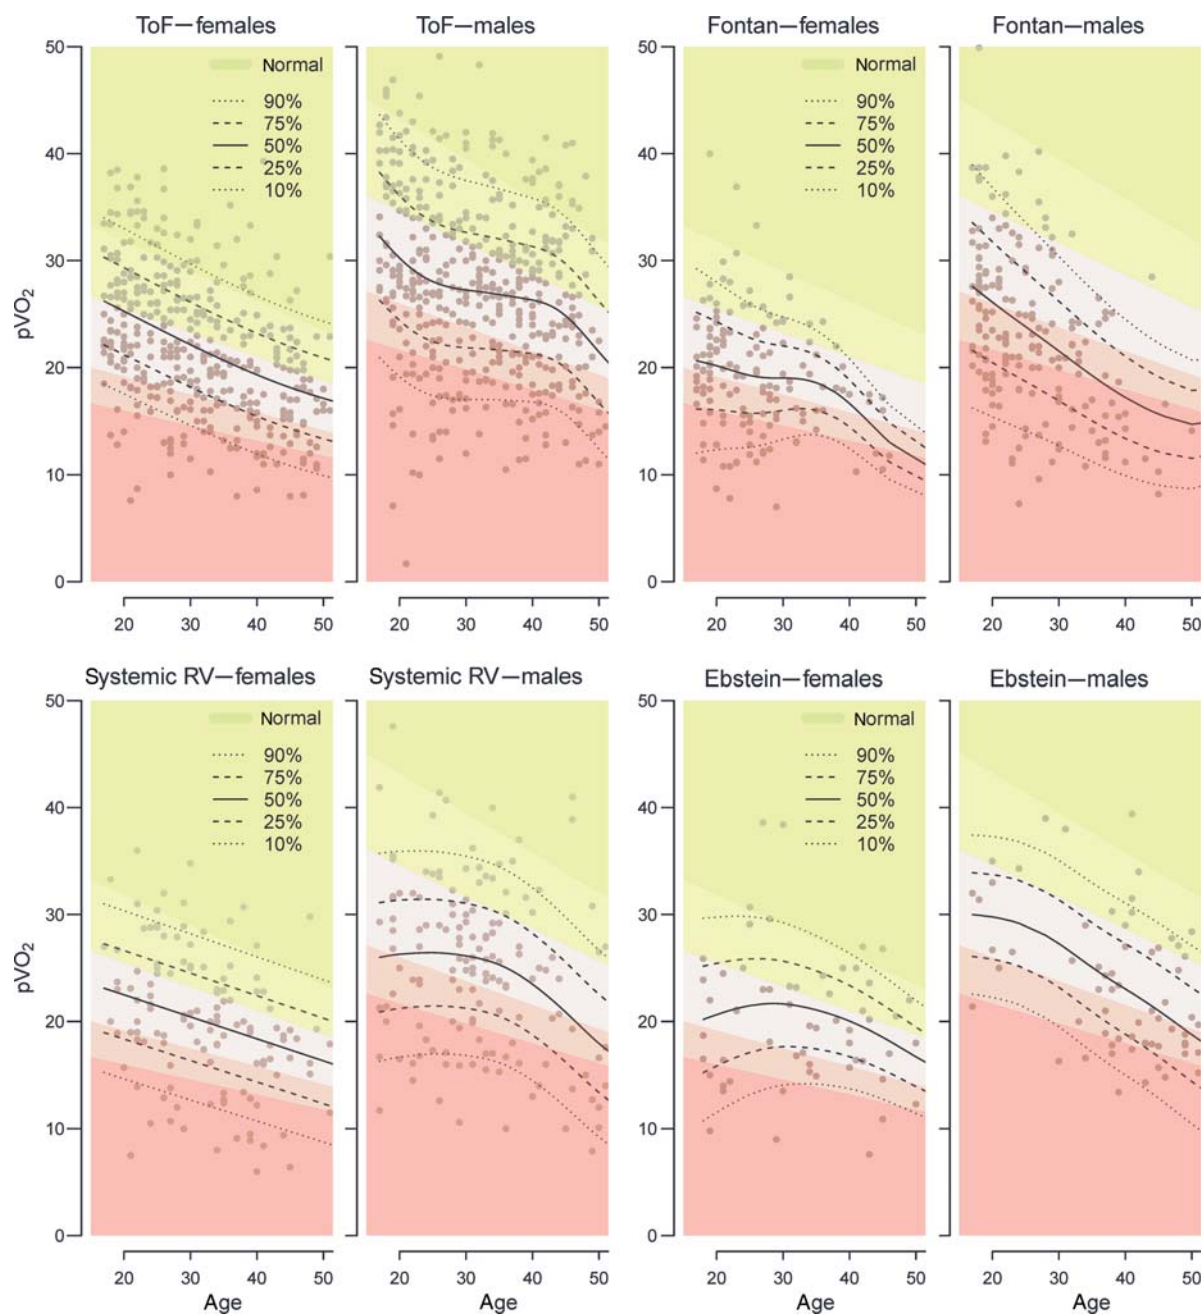

**Figure 3** Centile curves for peak  $\text{VO}_2$  ( $\text{pVO}_2$ ) in  $\text{mL}/\text{kg}/\text{min}$  for patients with tetralogy of Fallot, after Fontan palliation (Fontan), a systemic right ventricle (congenitally corrected transposition of the great arteries or transposition of the great arteries after atrial switch operation) and Ebstein anomaly. Background colours represent the level of exercise impairment compared with reference values for normal individuals (green, normal; pale green, borderline reduced exercise capacity; pale red, mildly impaired exercise capacity; red, moderately impaired exercise capacity; dark red, severely impaired exercise capacity).

found no significant difference in peak  $\text{VO}_2$  between males and females with Eisenmenger physiology (i.e. the most compromised subgroup). This suggests that disease-specific factors, such as reduced cardiac output, cyanosis, and restricted pulmonary blood flow, limit exercise tolerance in this setting. We contend that the clinical consequence of these findings is that improving exercise capacity through aerobic training is probably worthwhile in

virtually all ACHD patients. In addition, the differences in peak  $\text{VO}_2$  between men and women may impact on the ability to perform activities of daily life and be of importance for patient counselling.

According to Wassermann *et al.*,<sup>7</sup> predicted (normal) peak  $\text{VO}_2$  falls slowly in a sedentary woman of average weight and height with age ( $0.28 \text{ mL} \cdot \text{kg}^{-1} \cdot \text{min}^{-1}/\text{year}$ ) and reaches a value of  $20 \text{ mL} \cdot \text{kg}^{-1} \cdot \text{min}^{-1}$  by the age of 62.<sup>7,42</sup> The current study

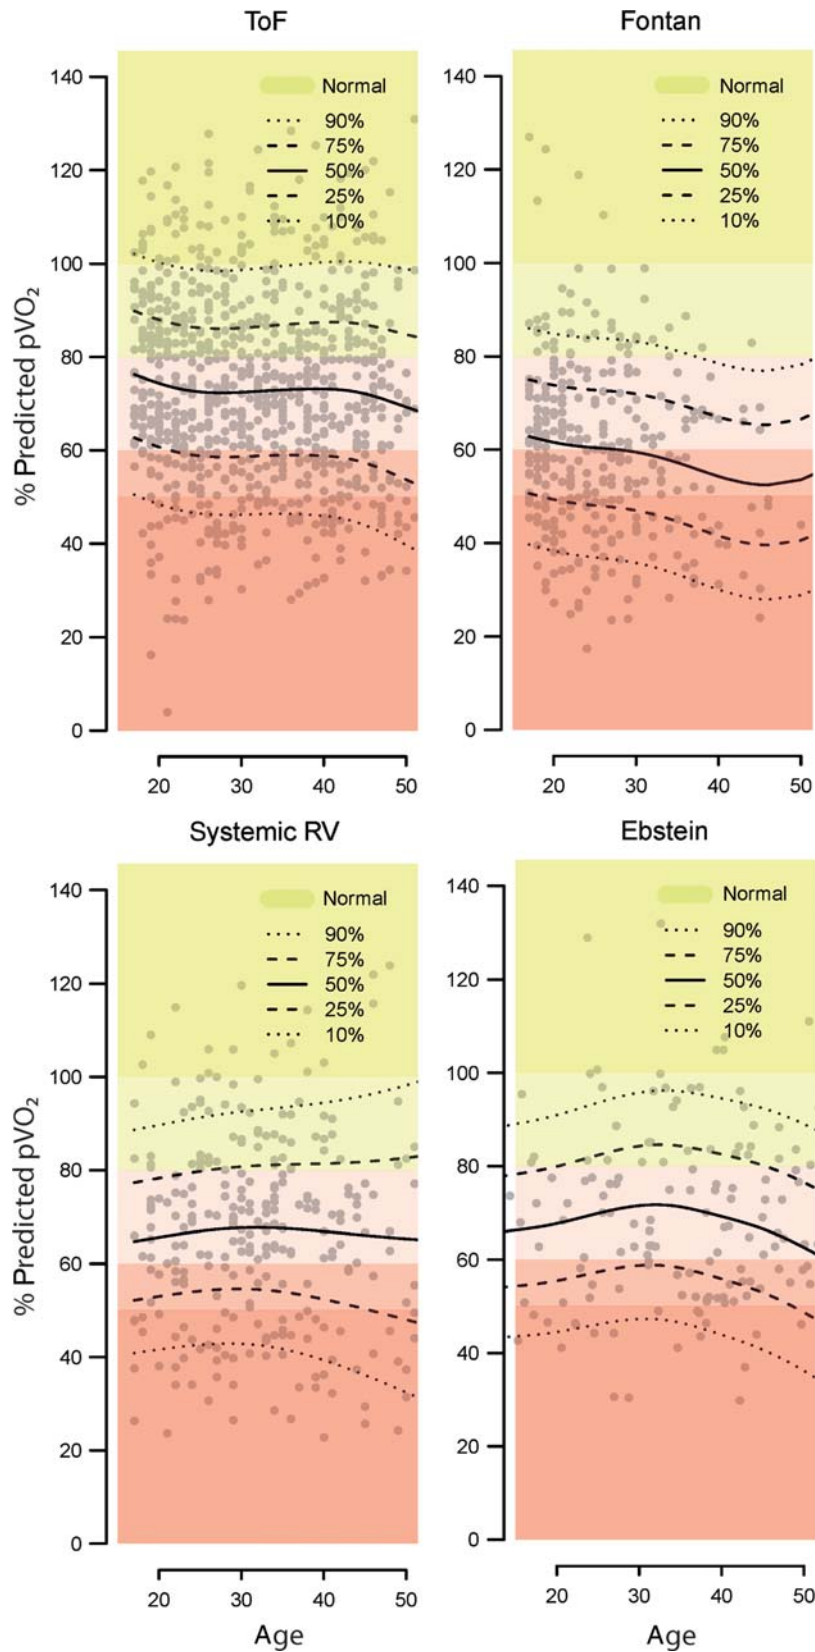

**Figure 4** Centile curves for peak  $\text{VO}_2$  ( $\text{pVO}_2$ ) as percentage of predicted  $\text{pVO}_2$  for patients with tetralogy of Fallot, after Fontan palliation (Fontan), a systemic right ventricle (congenitally corrected transposition of the great arteries or transposition of the great arteries after atrial switch operation) and Ebstein anomaly. Background colours represent the level of exercise impairment compared with reference values for normal individuals (green, normal; pale green, borderline reduced exercise capacity; pale red, mildly impaired exercise capacity; red, moderately impaired exercise capacity; dark red, severely impaired exercise capacity).



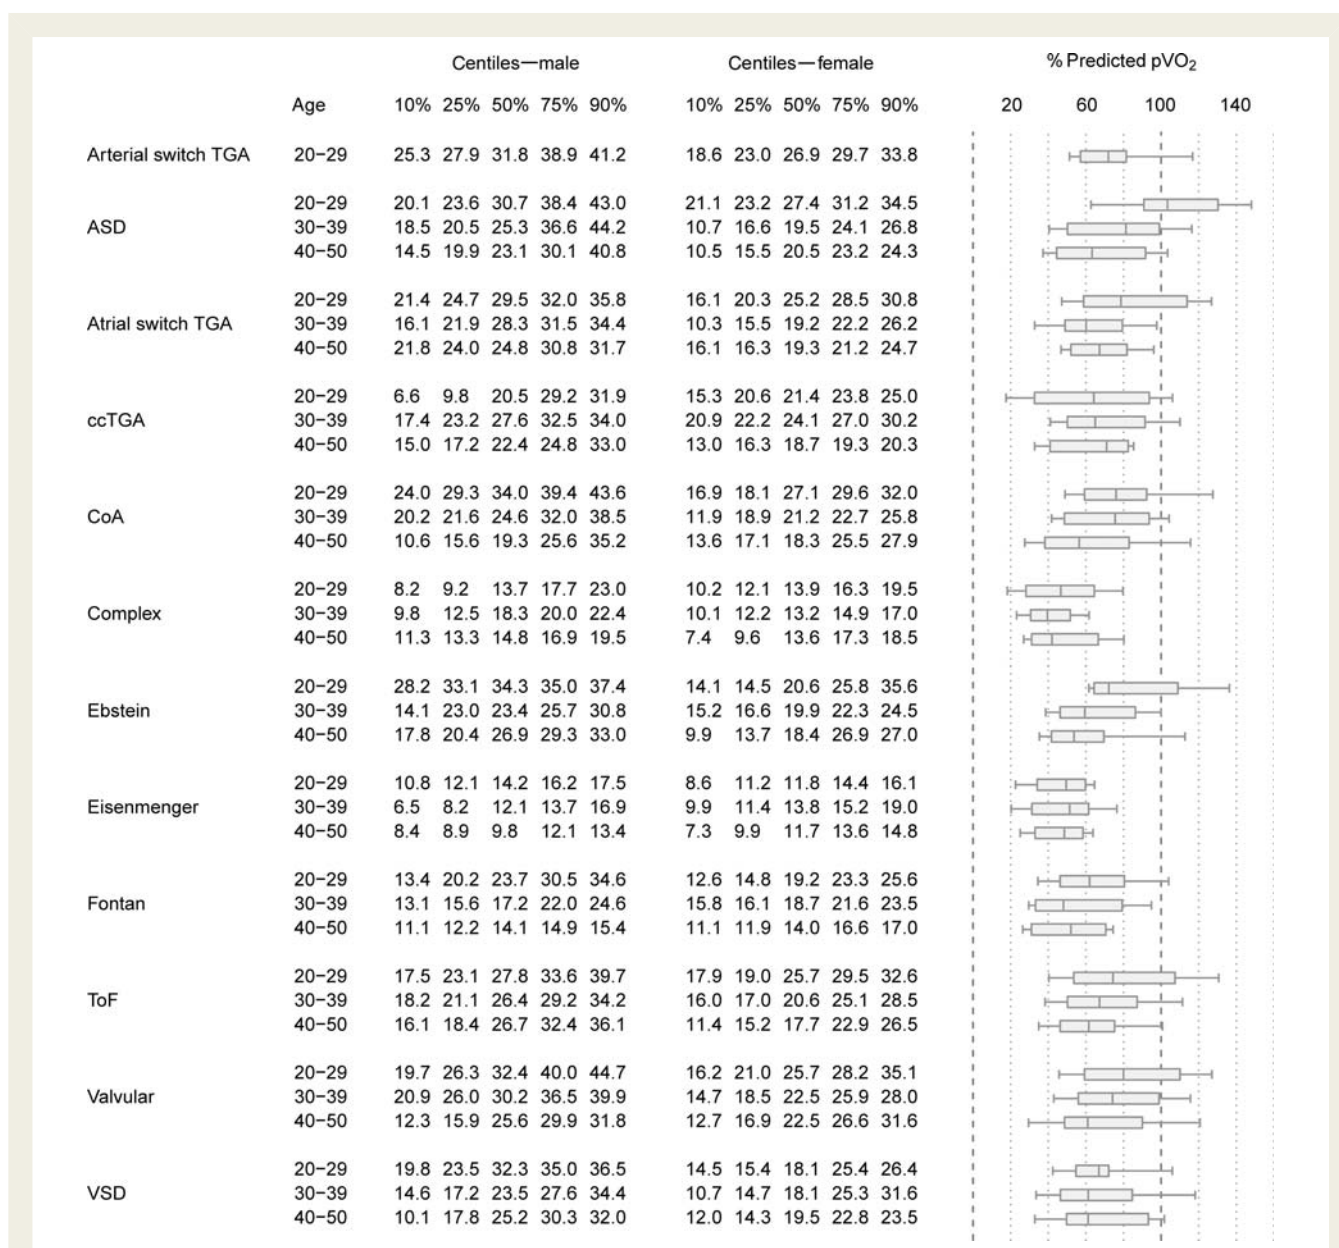

**Figure 5** Centile values for peak VO<sub>2</sub> (pVO<sub>2</sub>) based on the own data and shown separately for men and women (in mL/kg/min). The Boxplots show pVO<sub>2</sub> as percentage of predicted pVO<sub>2</sub> and represent 10, 25, 50, 75, and 90 centile of predicted pVO<sub>2</sub>.

shows that differences in peak VO<sub>2</sub> between genders are significant and already evident at a younger age. Applying the peak VO<sub>2</sub> cut-off values for light, moderate, and severely impaired exercise tolerance in heart failure as proposed by Weber *et al.* (20/16/10 mL · kg<sup>-1</sup> · min<sup>-1</sup>), significantly more women than men were in the more compromised groups (6/22/21/51 vs. 4/13/11/72%, respectively,  $P < 0.0001$ ).<sup>42</sup> This may have practical consequences. As illustrated in Figure 2 for many basic activities of daily life, the oxygen demand lies above 16 and 20 mL · kg<sup>-1</sup> · min<sup>-1</sup>, respectively. Women were found to be twice as likely as men, however, to have peak VO<sub>2</sub> values below these limits (odds ratio 1.7 and 2.4, respectively,  $P < 0.0001$  for both).

## Choice of occupation

Unemployment rates have been reported to be up to five times higher in ACHD patients compared with the general population.<sup>43</sup> Interestingly, the risk of unemployment was reported not to be related to the severity of the underlying cardiac lesion. Most patients with complex and cyanotic heart disease (or their parents) know that their exercise capacity is reduced and this should inform timely planning of future occupation. Many patients with less severe lesions and their parents may, however, not be aware of a reduced exercise capacity.<sup>17,44</sup> This may lead to inappropriate decisions regarding vocational or professional choices and may—in turn and at least in part—explain the high

unemployment rates reported among patients with less severe lesions. The data presented in the current study could be useful in advising patients in career matters. *Figure 2* provides estimates of peak  $\text{VO}_2$  required for certain (selected) occupations. Information for additional jobs is available in the literature or on the *Compendium of Physical Activities* website.<sup>5</sup> Comparing the required peak  $\text{VO}_2$  values with the distribution of oxygen uptake expected for a given condition should assist clinicians in deciding how likely it is that young patients with CHD may be able to cope with the physical demands of a job as a career.

## Percentiles of exercise capacity

The percentiles of expected exercise capacity presented in *Figure 3* are one of the key deliverables of the current study. They were constructed based on CPET data from our centre to allow assessing an individual patient's peak  $\text{VO}_2$  in relation to that of his/her peers of similar age and gender. These graphs indicate whether a patient has above or below average peak  $\text{VO}_2$  and whether a patient's peak  $\text{VO}_2$  lies below the expected 25 or 10th percentile.

We believe that this information is relevant to clinical decision-making; for example, when evaluating a ToF patient for surgical replacement of the pulmonary valve because of severe regurgitation. As the vast majority of ToF patients have some degree of exercise intolerance, the absolute peak  $\text{VO}_2$  value or the percentage of predicted peak  $\text{VO}_2$  achieved are of limited help in this case. Knowing that the patient has a 'good' or 'bad' exercise capacity by *ToF-standards* should be more helpful, however. This is analogous to nobody expecting a ToF patient with pulmonary regurgitation to have a normal sized right ventricle but too big a ventricle (compared with other ToF patients) could serve as a criterion to recommend surgery.

## Limitations of the study

This was a retrospective study performed at a tertiary ACHD centre. Furthermore, published data included in the analysis were by and large from tertiary ACHD centres, too. Selection bias, therefore, with inclusion of sicker patients with more reduced exercise capacity cannot be excluded. This could, for example, account for the fact that even patients with simple defects such as atrial septal defects, ventricular septal defects, and aortic coarctation were found to have reduced exercise capacity on average. Beyond the effect of the cardiac lesion, however, extracardiac factors such as deconditioning and peripheral muscle changes could also—at least in part—account for this observation. This is a cross-sectional study and provides the best estimate of exercise capacity of contemporary ACHD patients of various ages. It was not intended to study, and the results should not be used to, estimate the change in peak  $\text{VO}_2$  with ageing of an individual patient. This is because young patients included may have undergone different surgical/interventional procedures compared with older patients. For example, a 20-year-old Fontan patient is likely to have undergone a total cardiopulmonary anastomosis-operation, while a 40-year-old Fontan, almost certainly had a 'classic' Fontan. The decline in exercise capacity with ageing for the two patient groups, however, may be different as previously shown.<sup>13</sup> We acknowledge, therefore, that even within a given diagnostic ACHD subgroup, heterogeneity with regard to previous operation

exists (as illustrated by the Fontan example) and, therefore, clinicians should account for this fact when using the data. Although we found no evidence of relevant differences between peak  $\text{VO}_2$  reported in the literature and values obtained at our centre, we cannot exclude the possibility that such differences may exist for other centres. The data presented here represent a best estimate based on available information and require validation over time. The centile curves provided, despite being based on a large number of patients, are estimated based on a limited number of observations at the more extreme end of the age spectrum. This should be taken into account when interpreting the curves. In addition, further studies are required to investigate the reasons for the differences in the kinetics of the decline in exercise capacity between different diagnostic groups but also between genders. The reference values used for activities of life, sports, and occupation represent estimated average values and should not be taken as absolute cut-off values but rather be used for guidance only. In addition, other aspects of occupations or activities such as dexterity or mechanical efficiency in performing a task may be relevant but it is impossible to account for these factors in a study like ours.

## Conclusions

The current study reinforces the fact that exercise capacity is reduced in ACHD patients with the lowest values seen in patients with Eisenmenger syndrome and those with complex heart disease. Albeit even patients with simpler lesions are limited compared with reference values. Based on a large number of observations, we herewith provide gender- and age-specific reference peak  $\text{VO}_2$  centile plots for the most common lesions (ToF, systemic right ventricle, Ebstein anomaly Fontan—palliation) and relate disease-specific exercise capacity to that required for different physical activities and different occupations. This information should be useful for clinicians to guide therapy and assist advising patients on physical activity and professional or career choices.

Further studies are required to assess whether relating individual patients exercise capacity to that of other patients with the same diagnosis (i.e. normalizing for diagnosis based on the results of this study) improves the prognostic value of parameters of CPET compared with using absolute values or percentage predicted results only.

## Funding

A.K. was supported by the *Deutsche Herzstiftung e.V.* M.A.G. and the Royal Brompton ACHD Programme have received support from the British Heart Foundation. G.P.D. was supported by an unrestricted educational grant from Actelion, UK.

**Conflict of interest:** none declared.

## References

1. Warnes CA, Liberthson R, Danielson GK, Dore A, Harris L, Hoffman JJ, Somerville J, Williams RG, Webb GD. Task force 1: the changing profile of congenital heart disease in adult life. *J Am Coll Cardiol* 2001;**37**:1170–1175.
2. Baumgartner H, Bonhoeffer P, De Groot NM, de Haan F, Deanfield JE, Galie N, Gatzoulis MA, Gohlke-Baerwolf C, Kaemmerer H, Kilner P, Meijboom F, Mulder BJ, Oechslin E, Oliver JM, Serraf A, Szatmari A, Thaulow E, Vouhe PR, Walma E, Vahanian A, Auricchio A, Bax J, Ceconi C, Dean V, Filippatos G,

- Funck-Brentano C, Hobbs R, Kearney P, McDonagh T, Popescu BA, Reiner Z, Sechtem U, Sirnes PA, Tendera M, Vardas P, Widimsky P, Swan L, Andreotti F, Beghetti M, Borggrefe M, Bozio A, Brecker S, Budts W, Hess J, Hirsch R, Jondeau G, Kokkonen J, Kozelj M, Kucukoglu S, Laan M, Lionis C, Metreveli I, Moons P, Pieper PG, Pillosoff V, Popelova J, Price S, Roos-Hesselink J, Uva MS, Tornos P, Trindade PT, Ukkonen H, Walker H, Webb GD, Westby J. ESC Guidelines for the management of grown-up congenital heart disease (new version 2010). *Eur Heart J* 2010;**31**:2915–2957.
3. Warnes CA, Williams RG, Bashore TM, Child JS, Connolly HM, Dearani JA, del Nido P, Fasules JW, Graham TP Jr., Hijazi ZM, Hunt SA, King ME, Landzberg MJ, Miner PD, Radford MJ, Walsh EP, Webb GD. ACC/AHA 2008 Guidelines for the Management of Adults with Congenital Heart Disease: a report of the American College of Cardiology/American Heart Association Task Force on Practice Guidelines (writing committee to develop guidelines on the management of adults with congenital heart disease). *Circulation* 2008;**118**: e714–e833.
  4. Dimopoulos K, Okonko DO, Diller GP, Broberg CS, Salukhe TV, Babu-Narayan SV, Li W, Uebing A, Bayne S, Wensel R, Piepoli MF, Poole-Wilson PA, Francis DP, Gatzoulis MA. Abnormal ventilatory response to exercise in adults with congenital heart disease relates to cyanosis and predicts survival. *Circulation* 2006;**113**:2796–2802.
  5. Compendium of Physical Activities. Arizona State University, Healthy Lifestyles Research Center; [cited 2011 01.07.2011]; Available from: <http://sites.google.com/site/compendiumofphysicalactivities/contact-us>.
  6. McNaught AD, Wilkinson A, *International Union of Pure and Applied Chemistry. Compendium of chemical terminology: IUPAC recommendations*. 2nd ed. Oxford England; Malden, MA, USA: Blackwell Science; 1997.
  7. Wasserman K. *Principles of Exercise Testing and Interpretation: Including Pathophysiology and Clinical Applications*. 4th ed. Philadelphia: Lippincott Williams & Wilkins; 2005.
  8. Peebles L, Norris B. *ADULTDATA: The Handbook of Adult Anthropometric and Strength Measurements*. Nottingham: University of Nottingham, Product Safety and Testing Group; 1998.
  9. Cole TJ, Green PJ. Smoothing reference centile curves: the LMS method and penalized likelihood. *Stat Med* 1992;**11**:1305–1319.
  10. Rigby RA, Stasinopoulos DM. Smooth centile curves for skew and kurtotic data modelled using the Box-Cox power exponential distribution. *Stat Med* 2004;**23**: 3053–3076.
  11. Rigby RA, Stasinopoulos DM. Generalized additive models for location, scale and shape. *J R Stat Soc C (Appl Stat)* 2005;**54**:507–554.
  12. Rigby RA, Stasinopoulos DM. Using the Box-Cox t distribution in GAMLSS to model skewness and kurtosis. *Statistical Modelling*, 2006;**6**:209–229.
  13. Giardini A, Hager A, Pace Napoleone C, Picchio FM. Natural history of exercise capacity after the Fontan operation: a longitudinal study. *Ann Thorac Surg* 2008;**85**: 818–821.
  14. Mancini DM, Eisen H, Kusmaul W, Mull R, Edmunds LH Jr, Wilson JR. Value of peak exercise oxygen consumption for optimal timing of cardiac transplantation in ambulatory patients with heart failure. *Circulation* 1991;**83**:778–786.
  15. Ponikowski P, Francis DP, Piepoli MF, Davies LC, Chua TP, Davos CH, Florea V, Banasiak W, Poole-Wilson PA, Coats AJ, Anker SD. Enhanced ventilatory response to exercise in patients with chronic heart failure and preserved exercise tolerance: marker of abnormal cardiorespiratory reflex control and predictor of poor prognosis. *Circulation* 2001;**103**:967–972.
  16. Budts W, Scheurwegs C, Stevens A, Moons P, Van Deyk K, Vanhees L. The future of adult patients after Mustard or Senning repair for transposition of the great arteries. *Int J Cardiol* 2006;**113**:209–214.
  17. Diller GP, Dimopoulos K, Okonko D, Li W, Babu-Narayan SV, Broberg CS, Johansson B, Bouzas B, Mullen MJ, Poole-Wilson PA, Francis DP, Gatzoulis MA. Exercise intolerance in adult congenital heart disease: comparative severity, correlates, and prognostic implication. *Circulation* 2005;**112**:828–835.
  18. Diller GP, Giardini A, Dimopoulos K, Gargiulo G, Muller J, Derrick G, Giannakoulas G, Khambadkone S, Lammers AE, Picchio FM, Gatzoulis MA, Hager A. Predictors of morbidity and mortality in contemporary Fontan patients: results from a multicenter study including cardiopulmonary exercise testing in 321 patients. *Eur Heart J* 2010;**31**:3073–3083.
  19. Driscoll DJ, Mottram CD, Danielson GK. Spectrum of exercise intolerance in 45 patients with Ebstein's anomaly and observations on exercise tolerance in 11 patients after surgical repair. *J Am Coll Cardiol* 1988;**11**:831–836.
  20. Fernandes SM, Alexander ME, Graham DA, Khairy P, Clair M, Rodriguez E, Pearson DD, Landzberg MJ, Rhodes J. Exercise testing identifies patients at increased risk for morbidity and mortality following Fontan surgery. *Congenit Heart Dis* 2011;**6**:294–303.
  21. Fredriksen PM, Pettersen E, Thaulow E. Declining aerobic capacity of patients with arterial and atrial switch procedures. *Pediatr Cardiol* 2009;**30**:166–171.
  22. Fredriksen PM, Therrien J, Veldtman G, Warsi MA, Liu P, Siu S, Williams W, Granton J, Webb G. Lung function and aerobic capacity in adult patients following modified Fontan procedure. *Heart* 2001;**85**:295–299.
  23. Fredriksen PM, Veldtman G, Hechter S, Therrien J, Chen A, Warsi MA, Freeman M, Liu P, Siu S, Thaulow E, Webb G. Aerobic capacity in adults with various congenital heart diseases. *Am J Cardiol* 2001;**87**:310–314.
  24. Giardini A, Donti A, Specchia S, Coutsoumbas G, Formigari R, Prandstraller D, Bronzetti G, Bonvicini M, Picchio FM. Recovery kinetics of oxygen uptake is prolonged in adults with an atrial septal defect and improves after transcatheter closure. *Am Heart J* 2004;**147**:910–914.
  25. Giardini A, Hager A, Lammers AE, Derrick G, Muller J, Diller GP, Dimopoulos K, Odendaal D, Gargiulo G, Picchio FM, Gatzoulis MA. Ventilatory efficiency and aerobic capacity predict event-free survival in adults with atrial repair for complete transposition of the great arteries. *J Am Coll Cardiol* 2009;**53**:1548–1555.
  26. Giardini A, Khambadkone S, Rizzo N, Riley G, Pace Napoleone C, Muthialu N, Picchio FM, Derrick G. Determinants of exercise capacity after arterial switch operation for transposition of the great arteries. *Am J Cardiol* 2009;**104**:1007–1012.
  27. Harrison DA, Liu P, Walters JE, Goodman JM, Siu SC, Webb GD, Williams WG, McLaughlin PR. Cardiopulmonary function in adult patients late after Fontan repair. *J Am Coll Cardiol* 1995;**26**:1016–1021.
  28. Helber U, Baumann R, Sebaldt H, Reinhard U, Hoffmeister HM. Atrial septal defect in adults: cardiopulmonary exercise capacity before and 4 months and 10 years after defect closure. *J Am Coll Cardiol* 1997;**29**:1345–1350.
  29. Klimes K, Ovroutski S, Abdul-Khalik H, Ewert P, Alexi-Meskishvili V, Kuehne T, Gutberlet M, Berger F. Exercise capacity reflects ventricular function in patients having the Fontan circulation. *Cardiol Young* 2009;**19**:340–345.
  30. MacLellan-Tobert SG, Driscoll DJ, Mottram CD, Mahoney DW, Wollan PC, Danielson GK. Exercise tolerance in patients with Ebstein's anomaly. *J Am Coll Cardiol* 1997;**29**:1615–1622.
  31. Nir A, Driscoll DJ, Mottram CD, Offord KP, Puga FJ, Schaff HV, Danielson GK. Cardiorespiratory response to exercise after the Fontan operation: a serial study. *J Am Coll Cardiol* 1993;**22**:216–220.
  32. Norgard G, Bjorkhaug A, Vik-Mo H. Effects of impaired lung function and pulmonary regurgitation on maximal exercise capacity in patients with repaired tetralogy of Fallot. *Eur Heart J* 1992;**13**:1380–1386.
  33. Paridon SM, Mitchell PD, Colan SD, Williams RV, Blafox A, Li JS, Margossian R, Mital S, Russell J, Rhodes J. A cross-sectional study of exercise performance during the first 2 decades of life after the Fontan operation. *J Am Coll Cardiol* 2008;**52**:99–107.
  34. Samman A, Schwerzmann M, Balint OH, Tanous D, Redington A, Granton J, Siu SC, Silversides CK. Exercise capacity and biventricular function in adult patients with repaired tetralogy of Fallot. *Am Heart J* 2008;**156**:100–105.
  35. Trojnarzka O, Gwizdala A, Katarzynski S, Katarzynska A, Szyzka A, Lanocha M, Grajek S, Kramer L. Evaluation of exercise capacity with cardiopulmonary exercise test and B-type natriuretic peptide in adults with congenital heart disease. *Cardiol J* 2009;**16**:133–141.
  36. Weipert J, Koch W, Haehnel JC, Meisner H. Exercise capacity and mid-term survival in patients with tricuspid atresia and complex congenital cardiac malformations after modified Fontan-operation. *Eur J Cardiothorac Surg* 1997;**12**:574–580.
  37. Westhoff-Bleck M, Norozi K, Schoof S, Fuchs M, Tutarel O, Drexler H, Wessel A, Meyer GP. QRS duration in Fontan circulation in adults: a predictor of aerobic capacity. *Int J Cardiol* 2009;**132**:375–381.
  38. Astrand PO. Human physical fitness with special reference to sex and age. *Physiol Rev* 1956;**36**:307–335.
  39. Drinkwater BL. Women and exercise: physiological aspects. *Exerc Sport Sci Rev* 1984;**12**:21–51.
  40. Daida H, Allison TG, Johnson BD, Squires RW, Gau GT. Comparison of peak exercise oxygen uptake in men versus women in chronic heart failure secondary to ischemic or idiopathic dilated cardiomyopathy. *Am J Cardiol* 1997;**80**:85–88.
  41. Clark AL, Poole-Wilson PA, Coats AJ. Exercise limitation in chronic heart failure: central role of the periphery. *J Am Coll Cardiol* 1996;**28**:1092–1102.
  42. Weber KT, Janicki JS, McElroy PA. Determination of aerobic capacity and the severity of chronic cardiac and circulatory failure. *Circulation* 1987;**76**:VI40–VI45.
  43. Crossland DS, Jackson SP, Lyall R, Burn J, O'Sullivan JJ. Employment and advice regarding careers for adults with congenital heart disease. *Cardiol Young* 2005;**15**:391–395.
  44. Cheuk DK, Wong SM, Choi YP, Chau AK, Cheung YF. Parents' understanding of their child's congenital heart disease. *Heart* 2004;**90**:435–439.
  45. Giardini A, Specchia S, Berton E, Sangiorgi D, Coutsoumbas G, Gargiulo G, Oppido G, Bonvicini M, Picchio FM. Strong and independent prognostic value of peak circulatory power in adults with congenital heart disease. *Am Heart J* 2007;**154**:441–447.
